# Supplementary material for: A facile cost-effective electrolyte-assisted approach and comparative study towards the Greener synthesis of silica nanoparticles
Source: Royal Society of Chemistry journal article supplement (doi:10.1039/d2na00872f), 2023-01-01
Supplement: d2na00872f1.pdf [file d2na00872f1.pdf]

## Electronic supplementary material (ESI)

# A Facile Cost-effective Electrolyte-assisted Approach and Comparative study towards the Greener Synthesis of Silica Nanoparticles

Arighna Saha<sup>a,c</sup>, Kritika Narula<sup>b</sup>, Prashant Mishra<sup>b</sup>, Goutam Biswas<sup>a,\*</sup>, Snehasis Bhakta<sup>c,\*</sup>

<sup>a</sup> Department of Chemistry, Cooch Behar Panchanan Barma University, Cooch Behar, West Bengal, India 736101

<sup>b</sup> Department of Biochemical Engineering and Biotechnology, Indian Institute of Technology Delhi, New Delhi, India 110016

<sup>c</sup> Cooch Behar College, Cooch Behar, West Bengal, India 736101

\* Corresponding Author. Department of Chemistry, Cooch Behar College, Cooch Behar, West Bengal, WB 736101; Email: [snehasisbhakta@coochbeharcollege.org.in](mailto:snehasisbhakta@coochbeharcollege.org.in)

\* Corresponding Author. Department of Chemistry, Cooch Behar Panchanan Barma University, Cooch Behar, West Bengal, India 736101; Email address: [goutam@cbpbu.ac.in](mailto:goutam@cbpbu.ac.in)

## Experimental section

### Synthesis

SiNP has been synthesized in different solvent with different amounts of electrolyte and finally able to optimize the amounts of electrolyte, which can produce particle in nm sized with low polydispersity. All the synthesis was repeated and we found that all the particles are highly reproducible by sizes and PDI Values.

**Table S1:** Optimization of electrolyte concentration in different solvent.

| Solvent Conc.   | Electrolyte conc. | Zeta potential value | Average hydrodynamic size (nm) |
|-----------------|-------------------|----------------------|--------------------------------|
| 30% ethanol     | 0.080M            | -30.2mV              | >1 $\mu$ m                     |
| 30% ethanol     | 0.075M            | -31.2mV              | 800nm                          |
| 30% ethanol     | 0.068M            | -31.6mV              | 307nm                          |
| 30% methanol    | 0.068M            | -29.8mV              | 270nm                          |
| 30% isopropanol | 0.068M            | -33.8mV              | >1 $\mu$ m                     |
| 30% isopropanol | 0.034M            | -38.7mV              | >1 $\mu$ m                     |
| 30% isopropanol | 0.014M            | -60.1mV              | 481nm                          |

|            |        |         |            |
|------------|--------|---------|------------|
| 40%Ethanol | 0.068M | -31.8mV | >1 $\mu$ m |
| 40%Ethanol | 0.034M | -39mV   | 309nm      |

### Molybdate assay

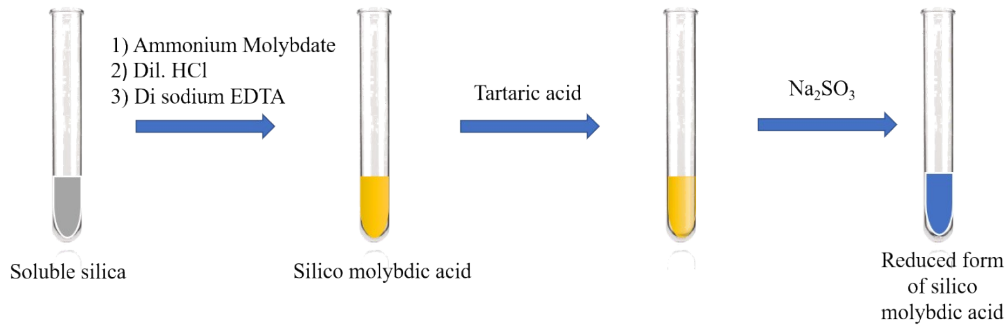

**Fig. S1:** Schematic presentation of soluble silica to blue colored silico molybdate formation.

$\text{H}_8\text{SiO}_6$ , this form of silicic acid is soluble in water which upon reaction with ammonium molybdate  $[(\text{NH}_4)_2\text{MoO}_4]$  gives yellow solution of silico molybdic acid  $\text{H}_8[\text{Si}(\text{Mo}_2\text{O}_7)_6]$ , and finally reduced to blue color by the reduction of sodium sulfite.

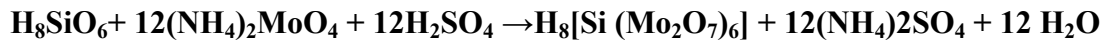

Now, this blue solution was used to measure the absorbance at 690-700 nm. From this absorbance data the concentration of silicic acid was measured.

**Calculation of change in relative concentration of silica nanoparticle ( $\frac{C}{C_0}$ )**

$$A = \epsilon Cl$$

A= absorbance  $\epsilon$  = molar absorptivity C= concentration l = path length

Using this absorbance, the  $C/C_0$  value was calculated.

$$\frac{C}{C_0} = \frac{C_0 - C_t}{C_0}$$

$$\frac{C}{C_0} = \frac{\left(\frac{A_0 - A_t}{\epsilon l}\right)}{\frac{A_0}{\epsilon l}}$$

$$\frac{C}{C_0} = \frac{A_0 - A_t}{A_0}$$

$C$  = (Conc. Of initial silicic acid - Conc. Of silicic acid in specific time) = nanoparticle concentration.  $C_0$  = Conc. Of initial silicic acid.

$A_0$  = Absorbance of initial silicic acid.  $A_t$  = Absorbance of silicic acid in specific time interval.

### ***Adsorption study of MB dye by SiNP***

Four different concentrations (5mg/L, 4mg/L, 3mg/L, 2mg/L) of 10mL Methylene Blue (MB) dye solution was used for adsorption of MB dye on 10 mg SiNP. The OD of all the solution was checked by using UV-vis spectrophotometer in specific time interval for 2hr to know the  $C_0$  i.e., Initial conc. of adsorbate (MB Dye). Finally, we calculate the  $Q_e$  (amount of adsorbed adsorbate (MB Dye) at equilibrium) by using the below equation,

$$\frac{C_0}{C_e} = \frac{A_0}{A_e}$$

$$C_e = \frac{A_e}{A_0} C_0$$

$$Q_e = \frac{(C_0 - C_e)}{M} V$$

$A_0$  = initial absorbance  $A_e$  = final absorbance

$C_e$  = Conc. of adsorbate at equilibrium (MB Dye)  $C_0$  = Initial conc. of adsorbate (MB Dye)

$Q_e$  = amount of adsorbed adsorbate (MB Dye) at equilibrium

$M$  = Mass of nanoparticle in g

$V$  = Volume of solution in L.

### ***Calculation of SiNP Specific Surface Area***

#### **Equation of Langmuir isotherm for the adsorption.**

$$Q_e = \frac{Q_m C_e}{k_d + C_e}$$

$$\frac{1}{Q_e} = \frac{k_d}{Q_m C_e} + \frac{1}{Q_m}$$

$$\frac{1}{Q_m} = \text{intercept} = 0.4$$

$$Q_m = 2.5\text{mg}/5\text{mg} = 0.5\text{g/g} = 0.001563\text{mol/g}$$

**Specific surface area**

$$S_L = Q_m \delta N$$

$$S_L = 0.001563 \times 175 \times 10^{-20} \times 6.023 \times 10^{23} = 1647.68 \text{ m}^2/\text{g}.$$

$$\delta = \text{area occupied by MB dye} = 175 \text{ \AA}^2$$

N = Avogadro number

$Q_m$  = maximum adsorption capacity

**Table S2:** Max Absorption capacity ( $Q_m$ ) and specific surface area ( $S_L$ )

| $R^2$ | $Q_m$ (mmol/g) | $S_L$ (m <sup>2</sup> /g) |
|-------|----------------|---------------------------|
| 0.988 | 1.563          | 1647.68                   |

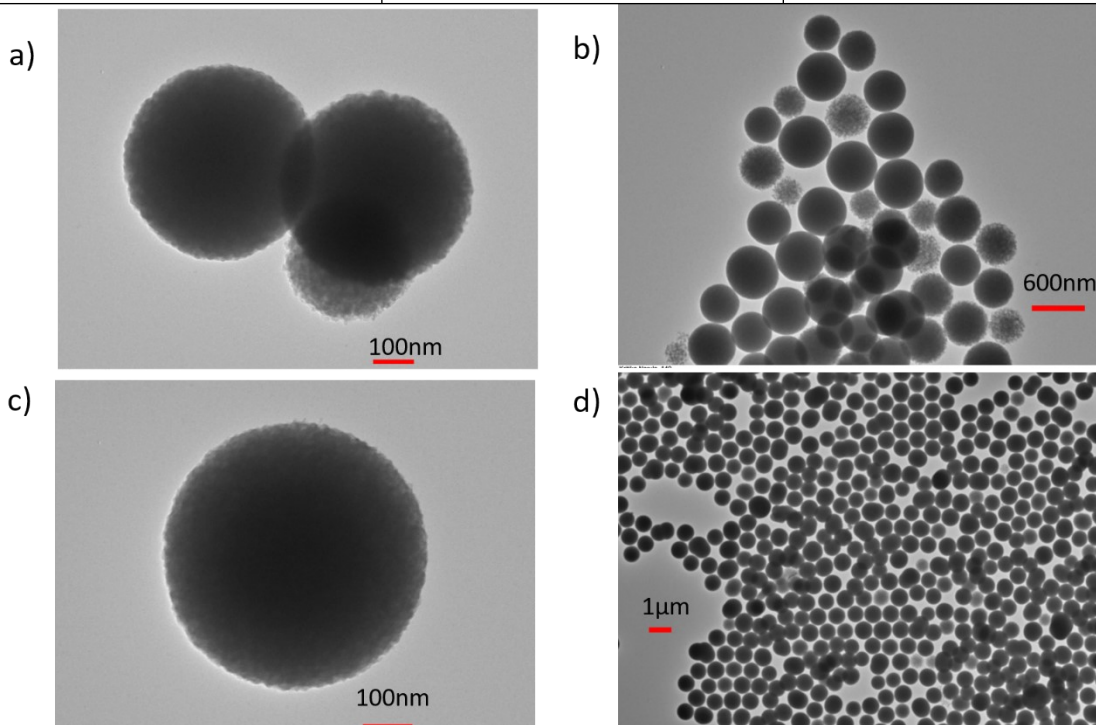

**Fig. S2:** a) & b) TEM images of SiNP synthesized using only 60% alcohol. c) & d) TEM images of SiNP synthesized using 30% alcohol in presence of electrolyte. The figures clearly indicate the presence of homogeneous particles supported by the PDI values as found in hydrodynamic size measurements

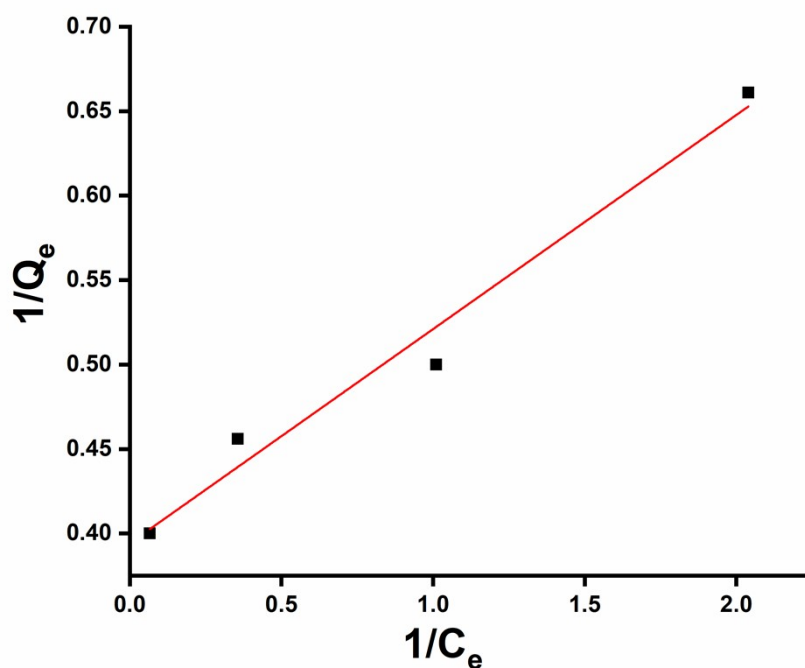

**Fig. S3:** Langmuir Adsorption Isotherm for monolayer adsorption on silica nanoparticles

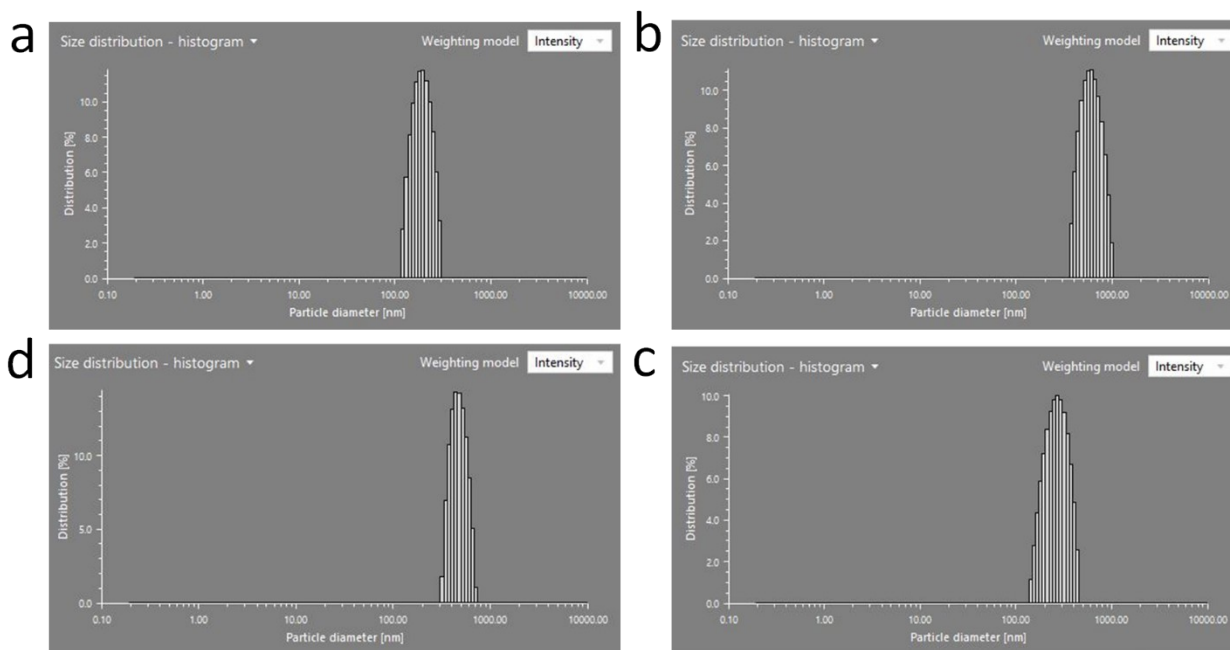

**Fig. S4:** Particle size distribution of silica nanoparticles synthesized under different conditions.
